# Supplementary material for: Using CHIRPS Dataset to Assess Wet and Dry Conditions along the Semiarid Central-Western Argentina
Source: Hindawi journal article supplement (doi:10.1155/2019/8413964), 2019-04-04
Supplement: f1 [file 8413964.f1.pdf]

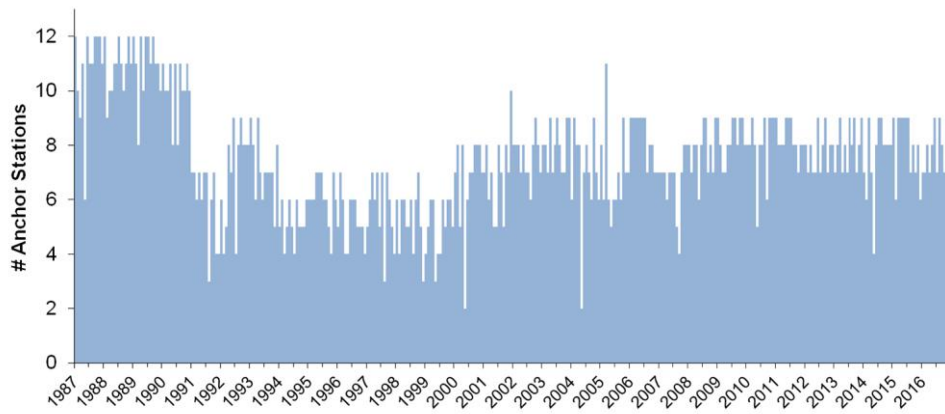

Figure 1 – Supplementary Material: Number of anchor stations used for the estimation of CHIRPS dataset in the domain 31°-39°S; 67°-71°W. Period 1987-2016.
